# Supplementary material
Source: publisher figshare collection journal article supplement (https://sage.figshare.com/ndownloader/files/17797481)
Supplement: Supplementary file 1 [file 17797481]

## Supplementary figures and tables

### A Composition of immigrant GPs in Norway, 2002-2016

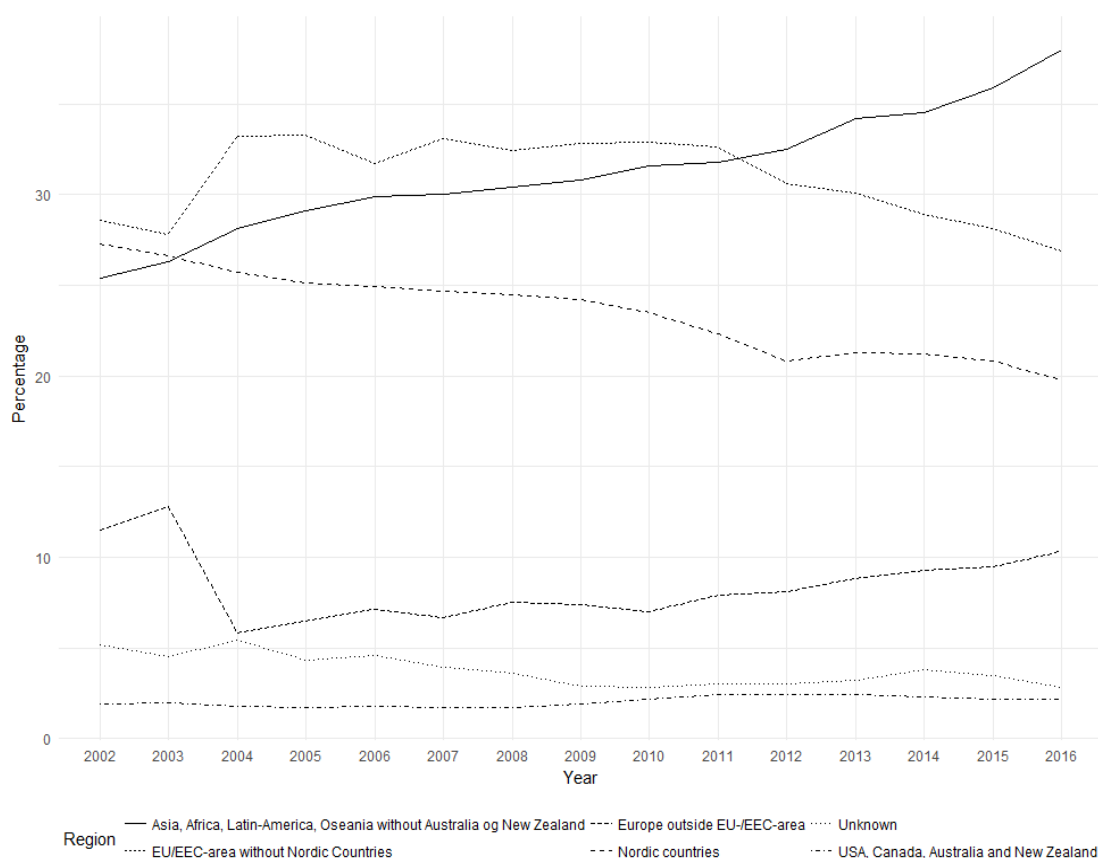

Figure 1: Share of immigrant GPs by region of origin, 2002-2016, data from Statistics Norway. Source: <https://data.ssb.no/api/v0/no/table/07386/>

## B Occupations included in the survey

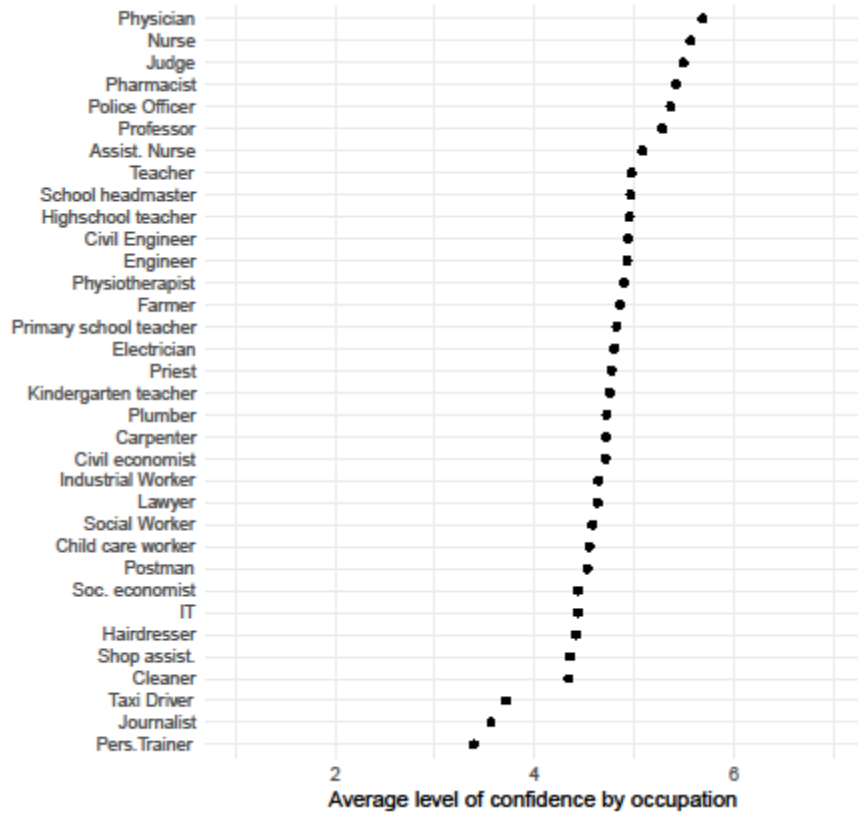

Figure 2: Average level of confidence for occupations included in the survey. (N=4006)

### C Mean scores per group for each treatment

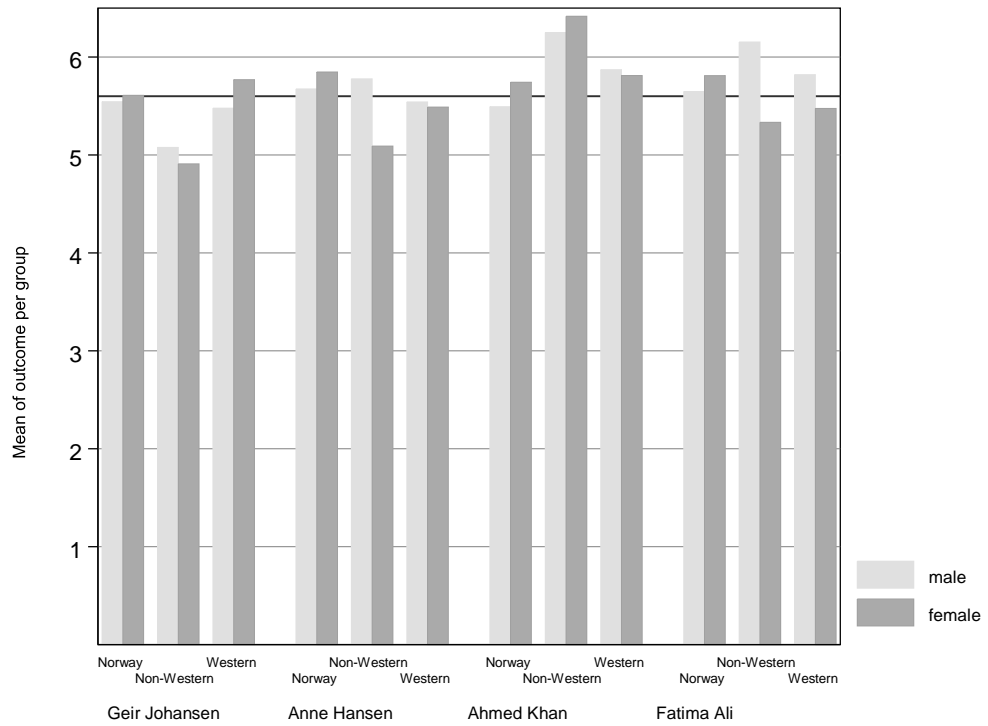

Figure 3: Mean scores for each subgroup on the outcome variable. The thick black line indicates the mean for the entire sample.

## D Regression table with all coefficients.

Table 1: Regression results of treatments upon confidence in GPs. Standard errors in parentheses.

|                           | Confidence in GP        |                          |
|---------------------------|-------------------------|--------------------------|
|                           | (1)                     | (2)                      |
| Anne                      | 0.168*** (0.054)        | 0.168*** (0.054)         |
| Ahm                       | 0.076 (0.053)           | 0.070 (0.053)            |
| ed                        | 0.154*** (0.053)        | 0.160*** (0.053)         |
| Highschool                |                         | 0.099 (0.062)            |
| Higher                    |                         | 0.266*** (0.068)         |
| education Self-           |                         | -0.255** (0.111)         |
| employed                  |                         | -0.337*** (0.073)        |
| Unemployed                |                         | 0.341*** (0.091)         |
| Student                   |                         | -0.076 (0.065)           |
| Income 20.000 - 29.999    |                         | 0.072 (0.082)            |
| Income 30.000 - 39.999    |                         | 0.019 (0.080)            |
| Income 40.000 - 49.999    |                         | 0.008 (0.082)            |
| Income 50.000 - 59.999    |                         | -0.095 (0.089)           |
| Income 60.000 - 69.999    |                         | -0.162 (0.105)           |
| Income 70.000 - 79.999    |                         | 0.032 (0.121)            |
| Income 80.000 - 99.999    |                         | -0.118 (0.124)           |
| Income Over               |                         | -0.065 (0.137)           |
| 100.000 Income:           |                         | -0.267*** (0.091)        |
| Less central municipality |                         | 0.010 (0.115)            |
| Somewhat central          |                         | 0.084 (0.091)            |
| Most central              |                         | 0.080 (0.084)            |
| Unknow                    |                         | 0.304 (0.331)            |
| Agcohort                  |                         | 0.058*** (0.018)         |
| Constant                  | 5.567*** (0.039)        | 5.224*** (0.149)         |
| Fixed effects?            | No                      | Yes: County              |
| Observations              | 3,857                   | 3,828                    |
| R <sup>2</sup>            | 0.003                   | 0.035                    |
| Adjusted R <sup>2</sup>   | 0.002                   | 0.024                    |
| Residual Std.             | 1.158 (df = 3853)       | 1.144 (df = 3786)        |
| Error F Statistic         | 4.178*** (df = 3; 3853) | 3.313*** (df = 41; 3786) |

Note:

\*p<0.1; \*\*p<0.05; \*\*\*p<0.01

Reference levels omitted.

## E Predicted levels of confidence by gender

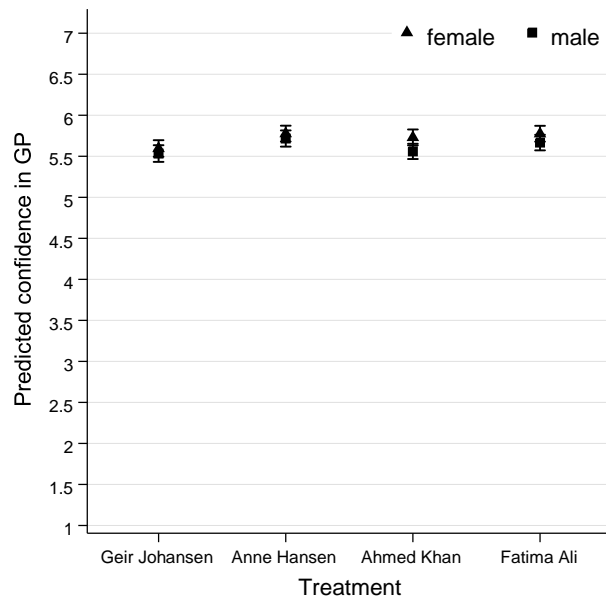

Figure 4: Predicted levels of confidence for all treatments with symmetrical 95% confidence intervals estimated from the model with controls. Baseline category: Geir

The results show no significant difference between female and male respondents in terms of their average trust in the assigned GPs.

## F Predicted levels of confidence by ethnicity

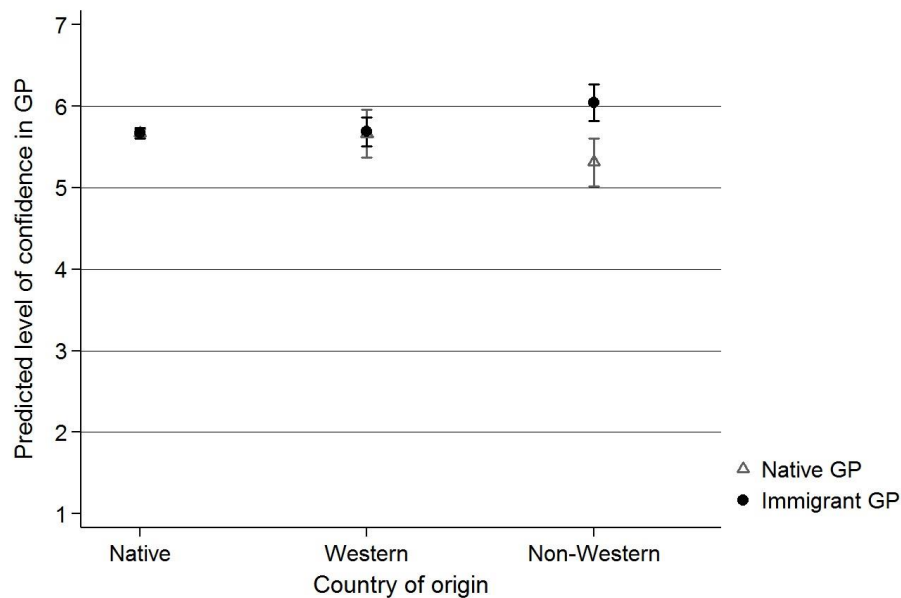

Figure 5: Predicted level of confidence in general practitioners for Norwegians, Western and non-Western immigrants with 95% confidence intervals.

The results show that on Norwegians have on average comparable levels of trust in immigrant/Non-Western GP compared to native GPs. The Western group of respondents are equally trustworthy of non-Western (Fatima and Ahmed) and Norwegian GPs (Anne and Geir). The non-Western group has on average significantly more trust in Non-Western GPs, compared to Norwegian GPs.

## G Interaction between treatments and region of origin with Geir and Non-Western immigrants as reference categories.

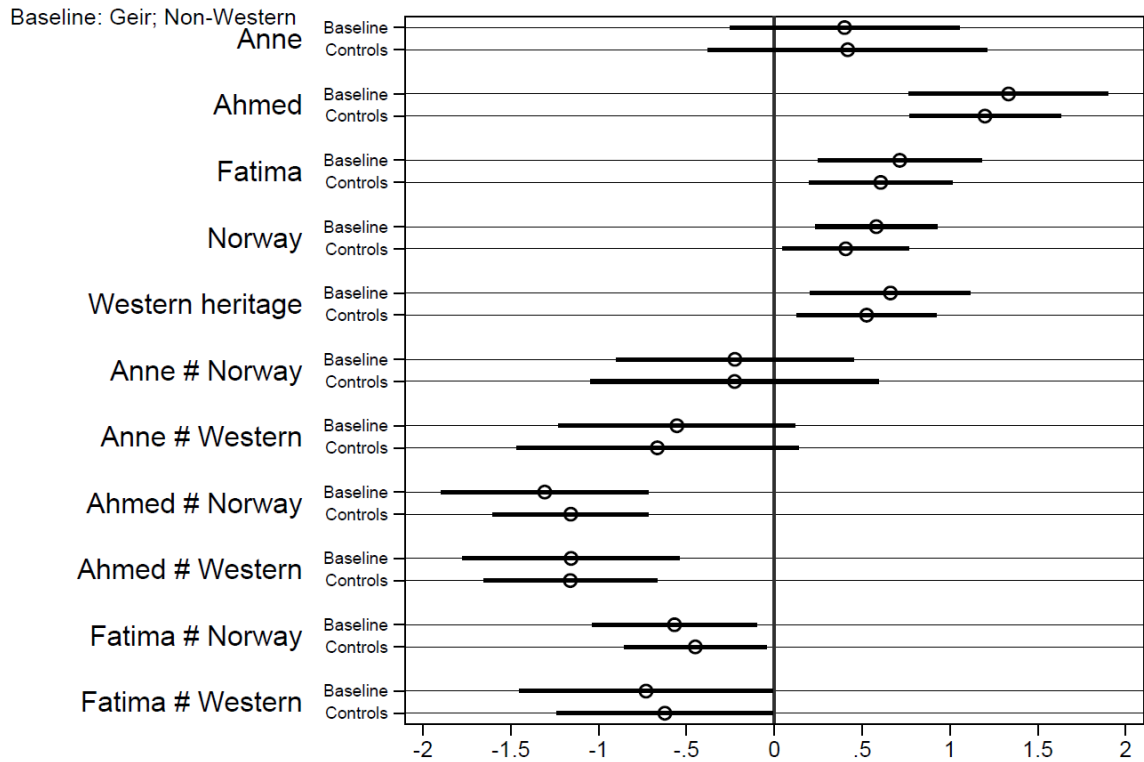

Figure 6: Coefficients with 95% confidence interval based on model with Geir and Non-Western heritage as baseline (analogous to Main Text Table 2, model 5).

Figure 6 illustrates the interaction between the treatments and the geographic origin of the respondents. The reference category in Figure 6 is composed of Non-Western respondents who were allocated Geir (Norwegian GP). The findings illustrate that, non-Western immigrants have, on average, more trust in Ahmed and Fatima, than Geir. However, respondents with a non-Western background do not significantly trust Anne more than Geir.

## H Post-treatment trust in GPs

Table 2: Regression results with the post-treatment trust in GPs.

|                     | Post-treatment trust in GPs |                     |                     |                     |                      |
|---------------------|-----------------------------|---------------------|---------------------|---------------------|----------------------|
|                     | Model 1                     | Model 2             | Model 3             | Model 4             | Model 5              |
| Anne                | 0.045<br>(0.055)            | 0.035<br>(0.055)    | 0.061<br>(0.078)    | 0.061<br>(0.058)    | 0.083*<br>(0.048)    |
| Ahmed               | 0.041<br>(0.054)            | 0.037<br>(0.054)    | -0.009<br>(0.075)   | 0.059<br>(0.057)    | 0.068<br>(0.047)     |
| Fatima              | -0.006<br>(0.054)           | -0.013<br>(0.054)   | -0.009<br>(0.076)   | 0.015<br>(0.057)    | 0.018<br>(0.047)     |
| Female              |                             | -0.018<br>(0.041)   | -0.005<br>(0.079)   | 0.014<br>(0.038)    | -0.107***<br>(0.034) |
| Non-Western         |                             | -0.235*<br>(0.123)  | -0.212*<br>(0.122)  | -0.239<br>(0.242)   | -0.066<br>(0.200)    |
| Western             |                             | 0.115<br>(0.074)    | 0.114<br>(0.073)    | 0.328**<br>(0.154)  | 0.339***<br>(0.128)  |
| Anne:female         |                             |                     | -0.032<br>(0.110)   |                     |                      |
| Ahmed:female        |                             |                     | 0.104<br>(0.108)    |                     |                      |
| Fatima:female       |                             |                     | 0.006<br>(0.108)    |                     |                      |
| Trust in doctors    |                             |                     |                     |                     | 0.637***<br>(0.015)  |
| Anne: Non-Western   |                             |                     |                     | -0.339<br>(0.358)   | -0.201<br>(0.294)    |
| Ahmed: Non-Western  |                             |                     |                     | 0.010<br>(0.349)    | -0.018<br>(0.287)    |
| Fatima: Non-Western |                             |                     |                     | 0.317<br>(0.328)    | 0.270<br>(0.270)     |
| Anne: Western       |                             |                     |                     | -0.141<br>(0.214)   | -0.245<br>(0.177)    |
| Ahmed: Western      |                             |                     |                     | -0.256<br>(0.213)   | -0.341*<br>(0.177)   |
| Fatima: Western     |                             |                     |                     | -0.407**<br>(0.205) | -0.383**<br>(0.171)  |
| Constant            | 5.056***<br>(0.039)         | 5.058***<br>(0.116) | 5.056***<br>(0.056) | 5.033***<br>(0.045) | 1.375***<br>(0.146)  |
| Fixed effects?      | No                          | No                  | No                  | Yes                 |                      |
| N                   | 3967                        | 3953                | 3967                | 3967                | 3933                 |
| R-squared           | 0.01                        | 0.01                | 0.01                | 0.01                | 0.34                 |

\*\*\* p < .01; \*\* p < .05; \* p < .1



# I Descriptive table across assigned case mean values

Table 3: Descriptive table across assigned case mean values (standard deviation in parentheses). T-test results ( $p < 0.05$ ) in relationship to Geir.

| Treatment   | Trust Score | Male   | Education | Immigrant | % sample receiving treat. | Don't know % |
|-------------|-------------|--------|-----------|-----------|---------------------------|--------------|
| Geir        | 5.57        | 0.50   | 1.90      | 0.10      | 23                        | 0.5          |
| Lehmann     | (1.06)      | (0.50) | (1.21)    | (0.30)    |                           |              |
| Anne Hansen | 5.74*       | 0.49   | 1.87      | 0.10      | 24                        | 0.9          |
|             | (1.01)      | (0.50) | (1.21)    | (0.29)    |                           |              |
| Ahmed Khan  | 5.64        | 0.52   | 1.83      | 0.09      | 25                        | 0.7          |
|             | (1.29)      | (0.50) | (1.22)    | (0.28)    |                           |              |
| Fatima Ali  | 5.72*       | 0.50   | 1.85      | 0.11      | 25                        | 0.8          |
|             | (1.22)      | (0.50) | (1.20)    | (0.31)    |                           |              |

\*  $p < 0.05$
